# Supplementary material for: Molecular phylogeny of Myriapoda provides insights into evolutionary patterns of the mode in post-embryonic development
Source: PubMed Central journal article supplement (PMC3927213; doi:10.1038/srep04127), 2014-02-18
Supplement: srep04127-s1.pdf [file srep04127-s1.pdf]

# **Molecular phylogeny of Myriapoda provides insights into evolutionary patterns of the mode in post-embryonic development**

Hideyuki Miyazawa<sup>1,2</sup>, Chiaki Ueda<sup>1,2</sup>, Kensuke Yahata<sup>3</sup> & Zhi-Hui Su<sup>1,2,\*</sup>

<sup>1</sup> Department of Biological Sciences, Graduate School of Science, Osaka University, Osaka 560-0043, Japan. <sup>2</sup> JT Biohistory Research Hall, 1-1 Murasaki-cho, Takatsuki, Osaka 569-1125, Japan. <sup>3</sup> Graduate School of Life and Environmental Sciences, University of Tsukuba, Tsukuba, Ibaraki 305-8572, Japan.

\*Correspondence and requests for materials should be addressed to Z.-H. S. (email: [su.zhihui@brh.co.jp](mailto:su.zhihui@brh.co.jp)).

Supplementary Information

## Epimorphosis

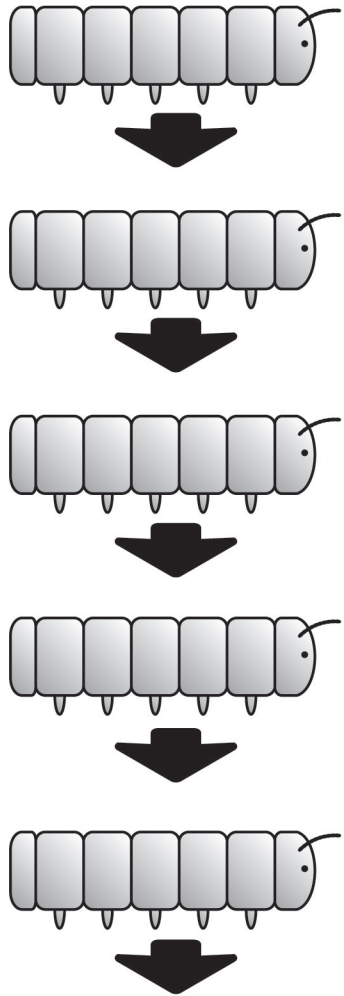

## Euanamorphosis

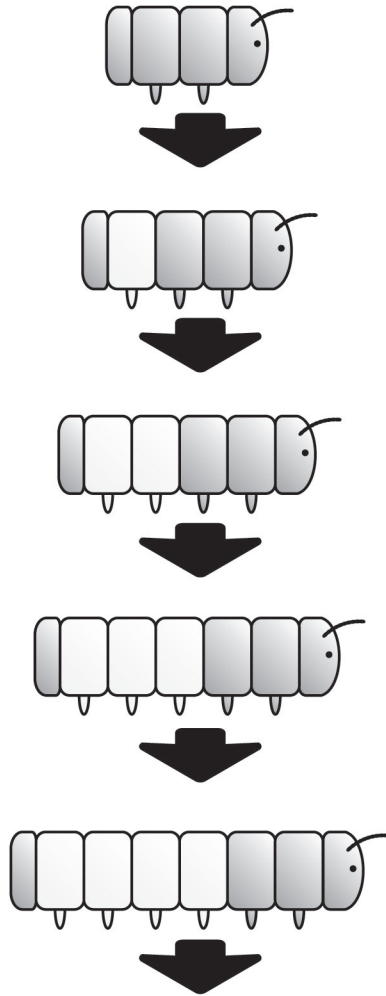

## Hemianamorphosis

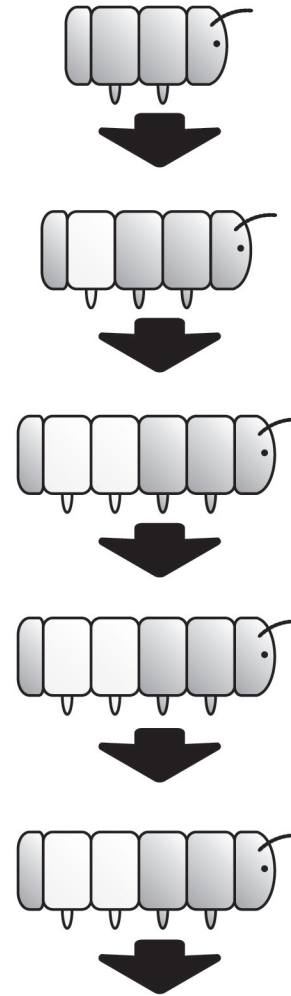

## Teloanamorphosis

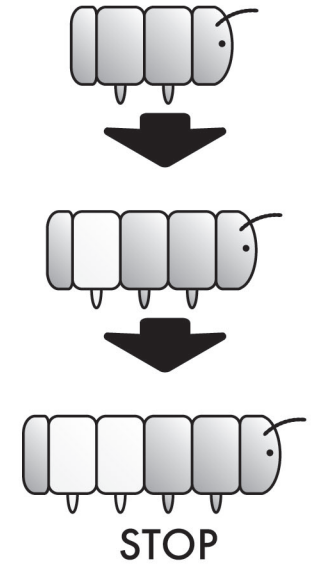

Supplementary Fig. S1. Four modes of metamorphosis during post-embryonic development in myriapods. For details, refer to the text. Modified by the first author (H.M.) based on Minelli and Fusco (2013).

Minelli, A. & Fusco, G. in *Arthropod Biology and Evolution: Molecules, Development, Morphology* (Springer, 2013).

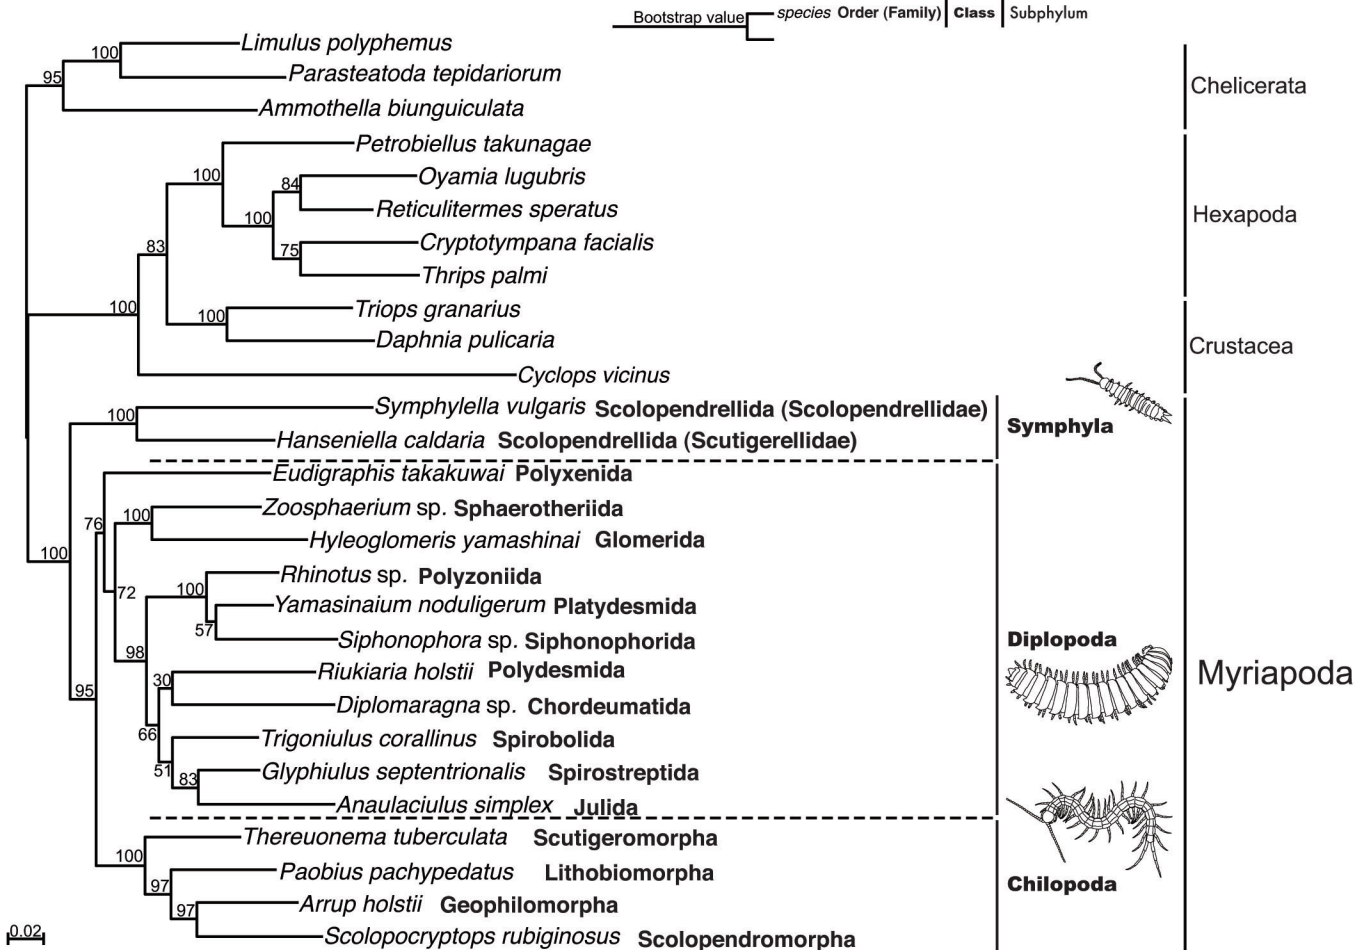

Supplementary Fig. S2. ML tree of myriapods excluding pauropods based on the combined amino acid sequences of DPD1, RPB1, and RPB2. Bootstrap values are shown at each node. Bold letters after the species name indicate order names. The illustrations of the three representative myriapods were drawn by the first author (H.M.) based on the pictures shown in Fig. 1.

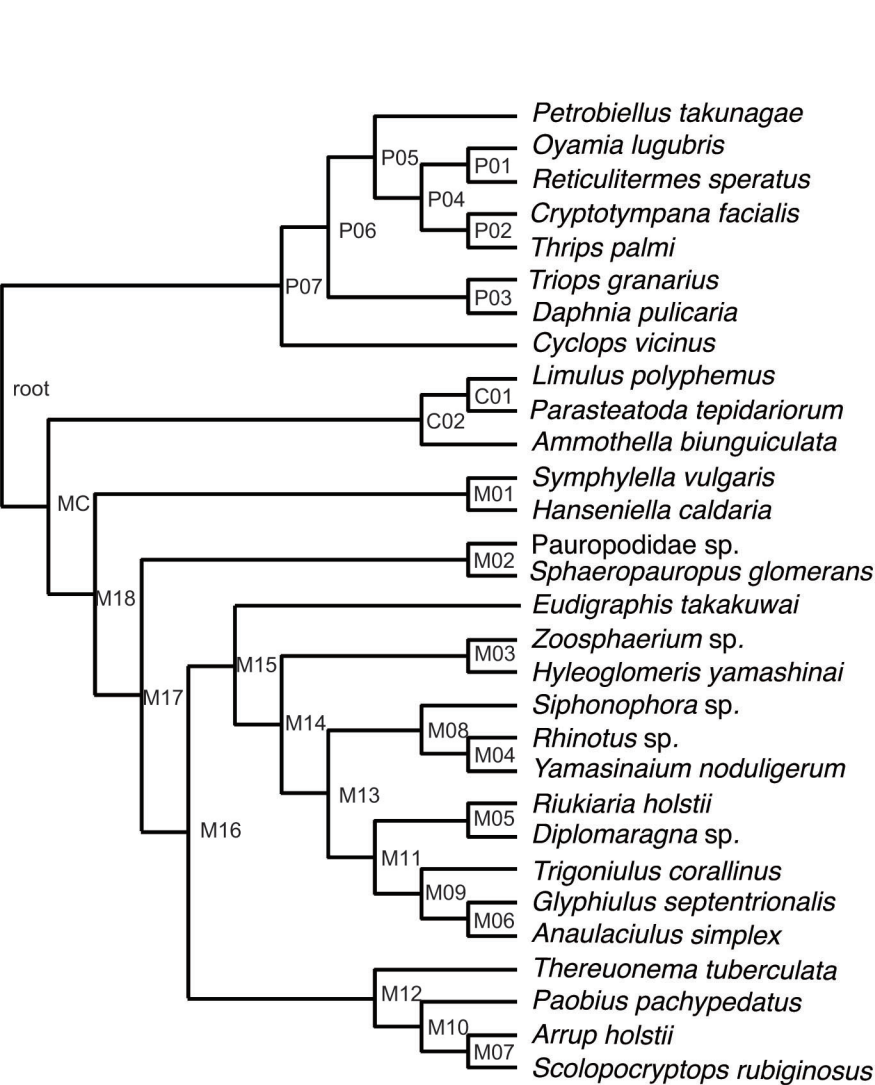

| Number | Topology                                                                                    | Median  | 95% HPD |        |
|--------|---------------------------------------------------------------------------------------------|---------|---------|--------|
| M01    | (24,10)                                                                                     | 373.35  | 248.44  | 481.54 |
| M02    | (15,23)                                                                                     | 200.397 | 109.88  | 294.61 |
| M03    | (30,11)                                                                                     | 319.682 | 220.56  | 407.72 |
| M04    | (19,29)                                                                                     | 174.383 | 101.29  | 255.27 |
| M05    | (7,20)                                                                                      | 304.269 | 231.93  | 364.54 |
| M06    | (3,9)                                                                                       | 221.508 | 144.78  | 295.78 |
| M07    | (17,21)                                                                                     | 298.905 | 271.93  | 326.01 |
| M08    | ((19,29),22)                                                                                | 214.591 | 136.85  | 296.04 |
| M09    | ((3,9),27)                                                                                  | 296.091 | 226.38  | 358.37 |
| M10    | (13,(17,21))                                                                                | 350.268 | 313     | 388.85 |
| M11    | ((7,20),(3,9),27))                                                                          | 344.661 | 288.46  | 396.3  |
| M12    | ((13,(17,21)),25)                                                                           | 405.215 | 372.81  | 438.06 |
| M13    | ((((19,29),22),(7,20),(3,9),27)))                                                           | 388.867 | 351.72  | 426.07 |
| M14    | (((((19,29),22),(7,20),(3,9),27))),30,11))                                                  | 434.733 | 391.81  | 479.44 |
| M15    | (8,(((19,29),22),(7,20),(3,9),27))),30,11))                                                 | 459.385 | 414.58  | 504.09 |
| M16    | ((((13,(17,21)),25),(8,(((19,29),22),(7,20),(3,9),27))),30,11)))                            | 484.341 | 440.39  | 530.03 |
| M17    | (((((13,(17,21)),25),(8,(((19,29),22),(7,20),(3,9),27))),30,11))),15,23))                   | 513.471 | 458.84  | 567.41 |
| M18    | ((24,10),(((13,(17,21)),25),(8,(((19,29),22),(7,20),(3,9),27))),30,11))),15,23))            | 539.069 | 484.39  | 593.42 |
| C01    | (15,12)                                                                                     | 308.872 | 192.37  | 426.55 |
| C02    | ((15,12),2)                                                                                 | 464.251 | 348.45  | 558.58 |
| MC     | ((((10,24),(((21,1),14),25),(8,(((3,9),27),(7,20),(22,29,19))),11,30))),16,23))),15,12),2)) | 581.453 | 524.46  | 636.18 |
| P01    | (14,18)                                                                                     | 201.489 | 129.99  | 280.95 |
| P02    | (4,26)                                                                                      | 202.15  | 126.33  | 274.75 |
| P03    | (6,28)                                                                                      | 434.263 | 390.8   | 479.21 |
| P04    | ((13,18),(4,26))                                                                            | 265.521 | 196.33  | 343.58 |
| P05    | (16,((13,18),(4,26)))                                                                       | 369.261 | 284.21  | 444.95 |
| P06    | ((6,28),(16,((13,18),(4,26))))                                                              | 496.498 | 445.21  | 553.36 |
| P07    | ((((6,28),(16,((13,18),(4,26))))),5)                                                        | 538.114 | 484.03  | 603.98 |
| root   |                                                                                             | 617.652 | 574.76  | 659.15 |

1, *Parasteatoda tepidariorum*; 2, *Ammothella biunguiculata*; 3, *Anaulaciulus simplex*; 4, *Cryptotympana facialis*; 5, *Cyclops vicinus*; 6, *Daphnia pulicaria*; 7, *Diplomaragna* sp.; 8, *Eudigraphis takakuwai*; 9, *Glyphiulus septentrionalis*; 10, *Hanseniella caldaria*; 11, *Hyleoglomeris yamashinai*; 12, *Limulus polyphemus*; 13, *Paobius pachypedatus*; 14, *Oyamia lugubris*; 15, *Paupodidae* sp.; 16, *Petrobiellus takunagae*; 17, *Arrup holstii*; 18, *Reticulitermes speratus*; 19, *Rhinotus* sp.; 20, *Riukiaria holstii*; 21, *Scolopocryptops rubiginosus*; 22, *Siphonophora* sp.; 23, *Sphaeropauropus glomerans*; 24, *Symphylella vulgaris*; 25, *Thereuonema tuberculata*; 26, *Thrips palmi*; 27, *Trigoniulus corallinus*; 28, *Triops granarius*; 29, *Yamasinaium noduligerum*; 30, *Zoosphaerium* sp.

Supplementary Fig. S3. Means and 95% highest posterior densities for all nodes from the divergence time estimation.

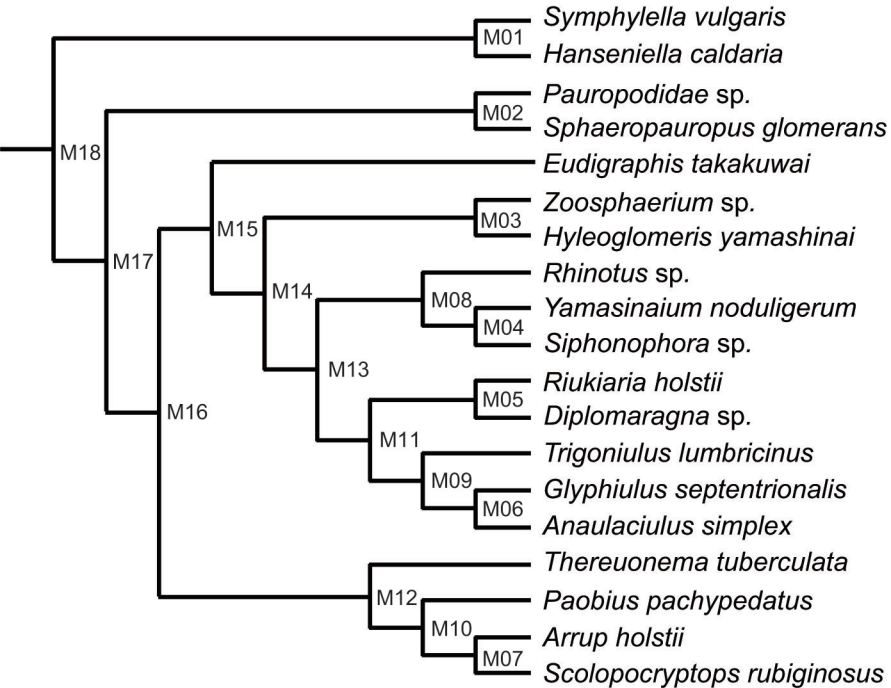

| Node No. | Topology                                                                          | Likelihood proportions |        |        |        |
|----------|-----------------------------------------------------------------------------------|------------------------|--------|--------|--------|
|          |                                                                                   | Epi                    | Hemi   | Telo   | Eu     |
| M01      | (6,15)                                                                            | 0.0011                 | 0.9968 | 0.0011 | 0.0011 |
| M02      | (9,14)                                                                            | 0.0009                 | 0.9972 | 0.0009 | 0.0009 |
| M03      | (7,19)                                                                            | 0.0004                 | 0.9967 | 0.0005 | 0.0025 |
| M04      | (10,18)                                                                           | 0.0001                 | 0.0019 | 0.0003 | 0.9977 |
| M05      | (11,18)                                                                           | 0.0058                 | 0.2325 | 0.4547 | 0.3070 |
| M06      | (2,5)                                                                             | 0.0019                 | 0.0813 | 0.0090 | 0.9078 |
| M07      | (1,12)                                                                            | 0.7333                 | 0.2569 | 0.0049 | 0.0049 |
| M08      | ((10,18),13)                                                                      | 0.0003                 | 0.0050 | 0.0006 | 0.9941 |
| M09      | ((2,5),17)                                                                        | 0.0015                 | 0.4013 | 0.0370 | 0.5601 |
| M10      | ((1,12),8)                                                                        | 0.0543                 | 0.9430 | 0.0013 | 0.0013 |
| M11      | ((11,18),((2,5),17))                                                              | 0.0013                 | 0.4039 | 0.0586 | 0.5362 |
| M12      | ((1,12),8),16)                                                                    | 0.0064                 | 0.9930 | 0.0003 | 0.0003 |
| M13      | ((10,18),13),((11,18),((2,5),17)))                                                | 0.0014                 | 0.4273 | 0.0355 | 0.5358 |
| M14      | ((7,19),(((10,18),13),((11,18),((2,5),17))))                                      | 0.0002                 | 0.9900 | 0.0008 | 0.0090 |
| M15      | ((7,19),(((10,18),13),((11,18),((2,5),17))))),4)                                  | 0.0001                 | 0.9987 | 0.0001 | 0.0011 |
| M16      | ((7,19),(((10,18),13),((11,18),((2,5),17))))),4),((1,12),8),16)                   | 0.0001                 | 0.9997 | 0.0000 | 0.0002 |
| M17      | ((9,14),(((7,19),(((10,18),13),((11,18),((2,5),17))))),4),((1,12),8),16))         | 0.0002                 | 0.9993 | 0.0002 | 0.0003 |
| M18      | ((6,15),((9,14),(((7,19),(((10,18),13),((11,18),((2,5),17))))),4),((1,12),8),16)) | 0.0009                 | 0.9973 | 0.0009 | 0.0009 |

Epi, epimorphosis; Hemi, hemianamorphosis; Eu, euanamorphosis; Telo, teloanamorphosis.

1, *Arrup holstii*; 2, *Anaulaciulus simplex*; 3, *Diplomaragna* sp.; 4, *Eudigraphis takakuwai*; 5, *Glyphiulus septentrionalis*; 6, *Hanseniella caldaria*; 7, *Hyleoglomeris yamashinai*; 8, *Paobius pachypedatus*; 9, *Pauropodidae* sp.; 10, *Rhinotus* sp.; 11, *Riukiaria holstii*; 12, *Scolopocryptops rubiginosus*; 13, *Siphonophora* sp.; 14, *Sphaeropaupopus glomerans*; 15, *Symphyrella vulgaris*; 16, *Thereuonema tuberculata*; 17, *Trigoniulus corallinus*; 18, *Yamasinaium noduligerum*; 19, *Zoosphaerium* sp.;

Supplementary Fig. S4. The likelihood proportions of the four modes of post-embryonic development on the nodes of the tree topology.
